# Supplementary material
Source: Springer Nature journal article supplement (https://www.springermedizin.de/resource/supplementary/12913_2012_2673_MOESM3_ESM.pdf/9531098)

The model starts at the patient level, with an ePRO dataset. New datasets can be sequentially added by warehousing or federated models. The key element is patient-level linkage.

ePRO data

Clinical and administrative data

Clinical trials and research related data

Molecular and biological data

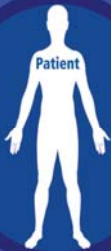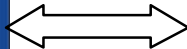

Societal level

National level

Health system level

Clinic level

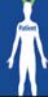

Supplement: MOESM3 [file 9531098]
